# Supplementary material
Source: Royal Society of Chemistry journal article supplement (doi:10.1039/d6tc01139j)
Supplement: d6tc01139j2.pdf [file d6tc01139j2.pdf]

## Supplementary information

### **Modified nonwoven with graphene for electromagnetic shielding and infrared Stealth**

Javiel Fernández, Olga Martín, Juan Carlos Cabanelas, Javier Pozuelo\*

Department of Materials Science and Engineering and Chemical Engineering, IAAB.  
University Carlos III of Madrid, 28911 Leganés, Spain

\* Javier Pozuelo. E-mail: [jpozue@ing.uc3m.es](mailto:jpozue@ing.uc3m.es)

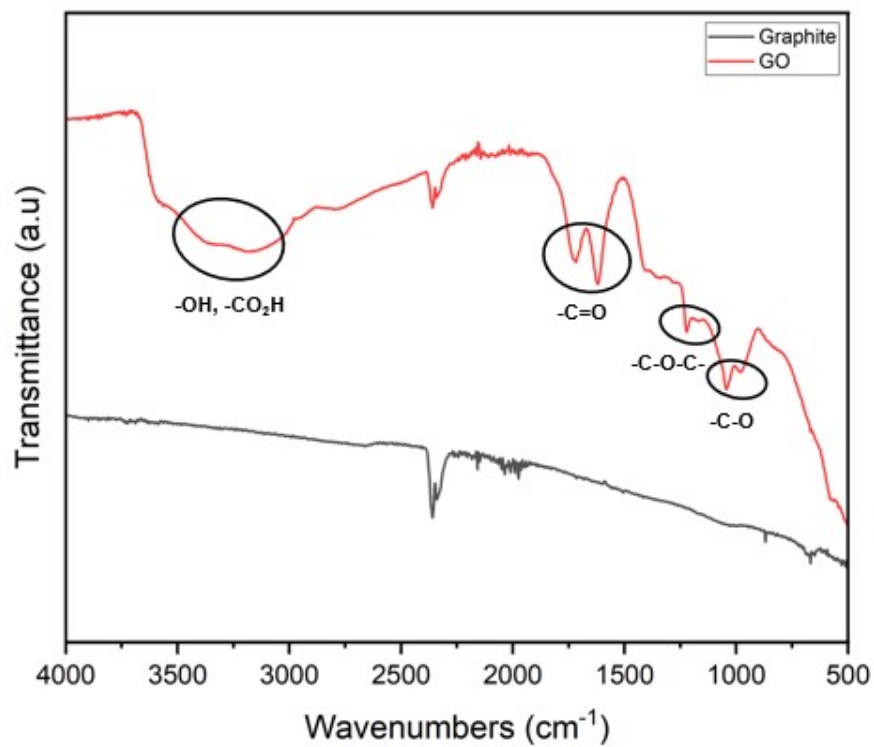

**Figure 1S.** FT-IR spectra of Graphite (black) and GO (red).

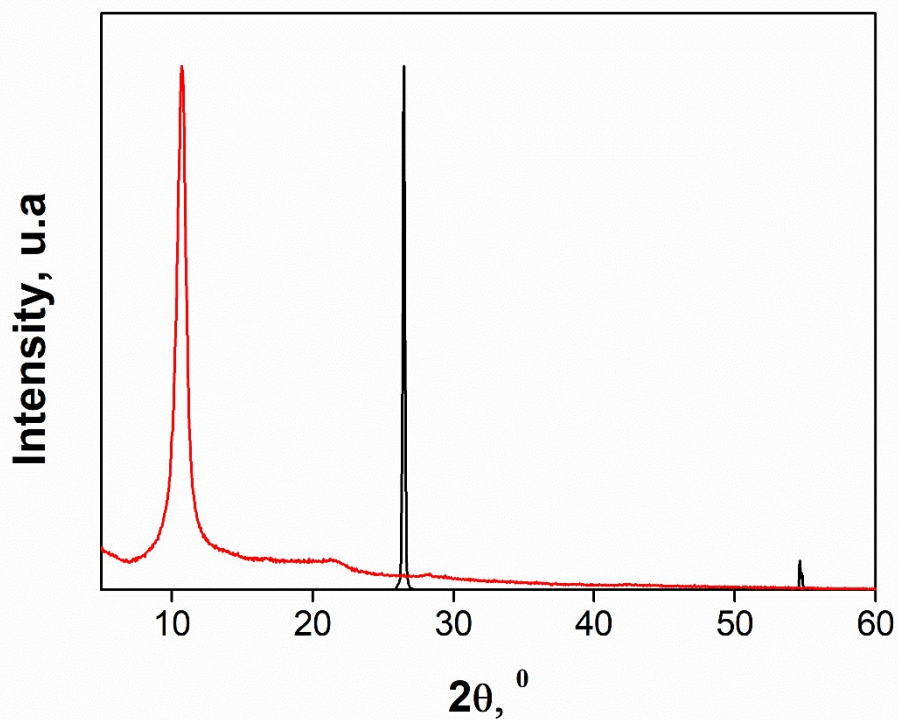

**Figure 2S.** XRD spectra of Graphite (black) and GO (red).

| Reduction<br>Adsorption | Hydrothermal<br>Synthesis – 0 h                                                   | Hydrothermal<br>Synthesis – 24 h                                                  | Heat treatment<br>500 °C                                                          | Heat treatment<br>1000 °C                                                          |
|-------------------------|-----------------------------------------------------------------------------------|-----------------------------------------------------------------------------------|-----------------------------------------------------------------------------------|------------------------------------------------------------------------------------|
| 1<br>adsorption         |  |  |  |  |
| 2<br>adsorption         |  |  |  |  |
| 3<br>adsorption         |  |  |  |  |
| 4<br>adsorption         |  |  |  |  |

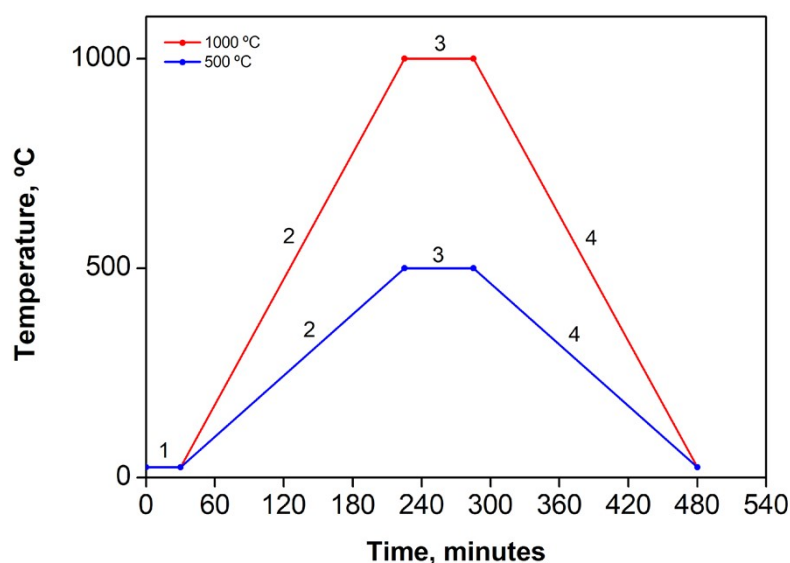

**Figure 3S.** (up)The aluminosilicate-base ceramic fiber after 1, 2, 3, and 4 GO immersions: column 1 includes the aluminosilicate-base ceramic fiber containing GO without thermal treatment, and columns 2 to 4 include the samples subjected to the different heat treatments, respectively. (down) Temperature ramp schemes used for the highest-temperature treatments at 500 and 1000 °C in the tubular oven: segments 1, 2, and 4: N<sub>2</sub> flow 1.5 L/min; segment 3: N<sub>2</sub>/H<sub>2</sub> (95:5) flow 0.6 L/min.

**Table 1S.** Weight gain of nonwovens after heat treatment

| Weight gain, %<br>Treatment | GO absorptions |     |     |     |
|-----------------------------|----------------|-----|-----|-----|
|                             | 1              | 2   | 3   | 4   |
| hydrothermal                | 0.5            | 1.3 | 2,9 | 3.4 |
| 500 °C                      | 0.4            | 1.1 | 2,7 | 3.1 |
| 1000 °C                     | 0.2            | 1,0 | 2.0 | 2.7 |

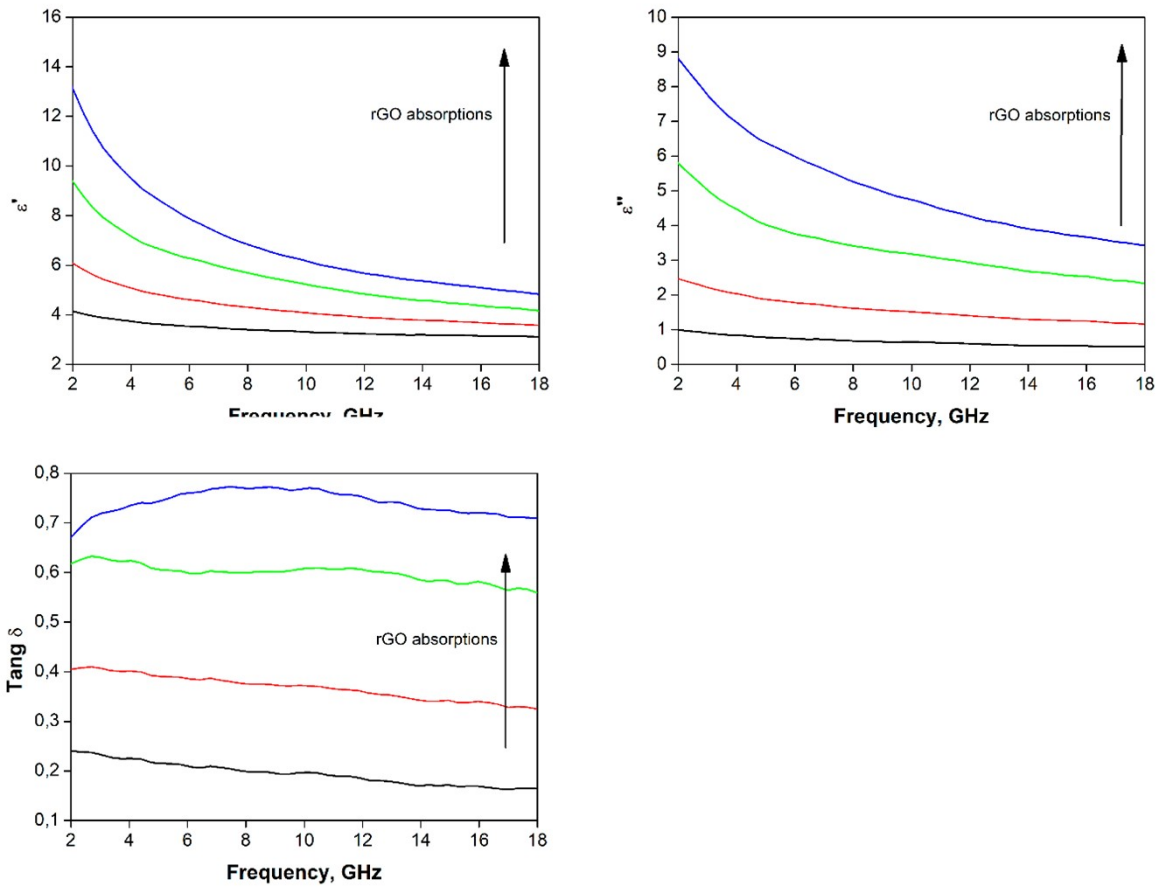

**Figure 4S.** The aluminosilicate-base ceramic fiber after 1, 2, 3, and 4 GO immersions, with a temperature treatments of 1000 °C,

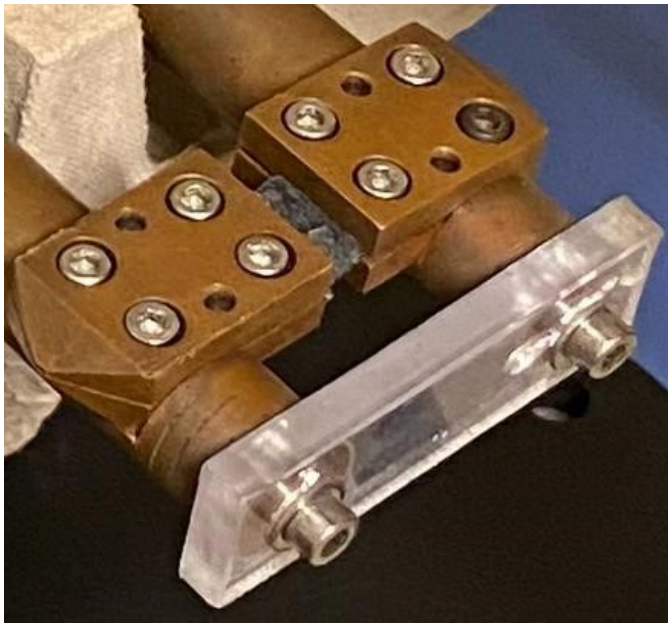

**Figure 5S.** Image of the cell employed to support the samples and to assess the Joule-Heating and heat resistance.

**Video 1.** Thermal shielding 50.mp4

Thermal shielding behavior of reduced graphene oxide nonwoven composites containing 4 GO adsorptions, respectively, and heat treatment at 1000 °C to 50 °C of the plate temperature.

**Video 2.** Thermal shielding 150.mp4

Thermal shielding behavior of reduced graphene oxide nonwoven composites containing 4 GO adsorptions, respectively, and heat treatment at 1000 °C to 150 °C of the plate temperature.

**Video 3.** Thermal shielding 200.mp4

Thermal shielding behavior of reduced graphene oxide nonwoven composites containing 4 GO adsorptions, respectively, and heat treatment at 1000 °C to 200 °C of the plate temperature.

**Video 4.** Joule-heating 1000\_6V.mp4

Joule-heating of reduced graphene oxide nonwoven composites containing 4 GO adsorptions, and heat treatment at 1000 °C. Applying cycles of 6 V.
